# Supplementary material
Source: MDPI journal article supplement (https://www.mdpi.com/1996-1073/15/18/6545)
Supplement: s1 [file s1]

**Associated publication: Ana Lagos, Joaquín E. Caicedo, Gustavo Coria, Andrés Romero Quete, Maximiliano Martínez, Gastón Suvire and Jesús Riquelme, “A Critical Review of Wind Speed and Power Forecasting Methods Applied in Modern Power Systems”**

This directory contains the details regarding the articles cited in this literature review, their belonging cluster, taxonomy and details about the input variables of the model, sampling times, data set used, country of precedence, and finally the models used to validate each of the proposed methods. According to the reviewed literature, the most used taxonomy to classify forecasting models by time horizon consists of very short, short term, medium, and long term. Therefore, in this paper, the reviewed articles are classified based on the aforementioned, and 4 tables are constructed based on very short, short term, medium, and long term.

**1. Very short term**

Table 1 provides details of the articles analyzed in this literature review related with very short term. Of the 80 articles studied, a total of 44 were categorized within this time horizon.

**2. Short term**

In the case of short-term articles, this category is made up of 31 articles. Table 2 provides further details regarding each of the categorized articles. The references with more than one time horizon and that qualify as very short and short-term models are [12], [16], [24], [61], [63], [78], these have been excluded from Table 2 considering that they are repeated and have been previously detailed in Table 1.

**3. Medium term**

The medium-term models include a total of 11 articles, see Table 3. The references that qualify as very short-term ([12], [24], [51]) and short-term ([11], [12], [24], [29], [62]) models have been excluded from Table 3, since they have already been previously detailed in Tables 1 and 2.

**4. Long term**

A total of 9 articles were established in this category. The references with more than one time horizon, and that classify within the very short-term models are ([12], [51], [55]), the short-term models ([12]) and finally the medium-term ones are ([12], [51]), these articles, as in previous cases, they have been omitted from Table 4, considering that they have been previously detailed.

**Table S1.** Very short-term bibliographical references.

| Cluster | Reference | Prediction objective | Forecasting applied to | Forecast Horizon                                      | Dataset (inputs; period; sampling horizon; location)                                                                                                | Uncertainty modelling | Forecasting method | Proposed model                      | Validation models                  |
|---------|-----------|----------------------|------------------------|-------------------------------------------------------|-----------------------------------------------------------------------------------------------------------------------------------------------------|-----------------------|--------------------|-------------------------------------|------------------------------------|
| 1       | [9]       | Wind speed           | DG                     | 1 h                                                   | Wind speed and direction, temperature, irradiation; --; 10 min average values; Serbia                                                               | Probabilistic         | AI                 | ANN; Uncertainty: Fuzzy set theory  | Compared with real wind speed data |
| 1       | [10]      | Wind power           | Wind farm              | 1 h                                                   | Meteorological data collected at different locations over the wind farm; 01.2013 - 10.2015; 1 h; Spain                                              | Deterministic         | Hybrid             | Optimization: ACO; Forecasting: ELM | Montecarlo simulations             |
| 1       | [12]      | Wind power           | Wind farm              | 1 h and can be taken in days, h, and any other format | Wind speed and direction, zonal and meridional components, weather predictions of current and past 24 h and power measurements; 3 years; 1 h; ECMWF | Deterministic         | Hybrid             | WN-LSTM                             | SVR, ARIMA, GPeANN                 |
| 2       | [16]      | Wind power           | MG energy management   | 1 and 5 h                                             | Wind power; 09.2015-10.2016; 1 h; China                                                                                                             | Deterministic         | Hybrid             | BP, GA                              | SVM and BP                         |
| 3       | [21]      | Wind power           | Wind farm              | 1 h                                                   | Wind power; 1 day; 5 min; Australia                                                                                                                 | Deterministic         | AI                 | FN                                  | ANN, Persistence model             |
| 4       | [24]      | Wind speed           | MG                     | 1, 24 and 48 h                                        | Cloud parameterization, land surface models, atmosphere-ocean coupling, broad radiation models and historical wind speed data; --; 15 min; Chile    | Deterministic         | Physical           | NWP, WRF                            | Wind speed measurement             |

|   |      |                                |                                            |        |                                                                                                                                                                                            |               |        |                                                                            |                                             |
|---|------|--------------------------------|--------------------------------------------|--------|--------------------------------------------------------------------------------------------------------------------------------------------------------------------------------------------|---------------|--------|----------------------------------------------------------------------------|---------------------------------------------|
| 4 | [27] | Wind speed                     | MG                                         | 1 h    | Wind speed; 10 min                                                                                                                                                                         | Deterministic | AI     | GA, BPNN                                                                   | Compared with real wind speed data          |
| 5 | [30] | Wind speed and power           | Wind farm                                  | 1 h    | Wind speed and power; 12.01.2003 – 11.30.2004; 1 h; Taiwan                                                                                                                                 | Deterministic | Hybrid | Preprocessing: EMD; Forecasting: BPNN                                      | ANN, ARIMA, Persistence model               |
| 5 | [33] | Wind power                     | Wind turbines                              | 10 min | Wind speed; 12 months; 10 min; South Africa                                                                                                                                                | Deterministic | Hybrid | Optimization: GA, PSO; Forecasting: ANFIS                                  | GA-ANFIS; PSO-ANFIS                         |
| 5 | [35] | Solar radiation and wind speed | Hybrid solar/wind renewable energy systems | 1 h    | Current time, cloud identification quality, sun angle altitude and azimuth, air temperature, relative humidity, atmospheric pressure, perceptible water; 1999 – 2019; 1 h; Jordan and Oman | Deterministic | AI     | BPNN                                                                       | Solar radiation and wind speed measurements |
| 7 | [45] | Wind speed                     | MG intelligent management                  | 1 h    | Wind speed; 01.01.2013 – 01.01.2014; 1 h; Canada                                                                                                                                           | Deterministic | Hybrid | Preprocessing: MRA; Forecasting: Adaptive WNN                              | Persistence model                           |
| 7 | [46] | Wind power                     | Wind farm                                  | 15 min | Wind speed and direction, temperature, output power; 01.01.2012 – 12.31.2012; 15 min; China                                                                                                | Deterministic | Hybrid | Preprocessing: Pearson's correlation; Forecasting: BPNN, RBF, LSSVM, ANFIS | BPNN; RBF; LSSVM                            |
| 7 | [47] | Wind speed                     | Wind farm                                  | 10 min | Wind speed; 1 year; 10 min; China                                                                                                                                                          | Deterministic | Hybrid | Preprocessing: EMD; Optimization: BA; Forecasting: BPNN, ENN, ARIMA, SVR   | EMD-ARIMA; EMD-BABPNN                       |

|   |      |                |                     |                     |                                                                                        |               |             |                                                                                   |                                                                          |
|---|------|----------------|---------------------|---------------------|----------------------------------------------------------------------------------------|---------------|-------------|-----------------------------------------------------------------------------------|--------------------------------------------------------------------------|
| 7 | [48] | Wind speed     | Wind farm           | 1 min               | Wind speed; 05.01.2017 – 05.31.2017; 1 min; India                                      | Deterministic | Hybrid      | Preprocessing: EMD, Pearson's correlation; Forecasting: Modified fuzzy Q learning | SVR; kNN                                                                 |
| 7 | [49] | Wind speed     | Not specified       | 3, 9, and 15 min    | Wind speed; 3 datasets of 1000 records and 1 dataset with 600000 records; 3 min; China | Deterministic | Hybrid      | Preprocessing: EWT, Distributed computing; Forecasting: ELM                       | Persistence model; CEEMD-ELM; EEMD-Structural Decomposition Analysis-ENN |
| 7 | [50] | Wind direction | Wind turbines       | 10 min              | Wind direction; 07.11.2014 – 11.22.201; 10 min; Iran                                   | Deterministic | Statistical | ARFIMA                                                                            | Wind direction measurements                                              |
| 8 | [51] | Heat demand    | Production planning | 1, 72 and 168 h     | Heat and weather factors, social components; 20 full weeks; 1 h; Finland               | Deterministic | Statistical | Simple regression model, SARIMA                                                   | Linear Regression Models                                                 |
| 8 | [52] | Wind speed     | Operation planning  | 10, 30 and 60 min   | Wind speed; February to July; 10-30-60 min, China                                      | Deterministic | Hybrid      | Preprocessing: BSO-Ssa; Forecasting: generalized DFNN                             | FNN and SSa-GDFNN                                                        |
| 8 | [53] | Wind speed     | Operation planning  | 10, 20 and 30 min   | Wind speed; January to July; 10 min; China                                             | Deterministic | Hybrid      | Preprocessing: WD; Optimization: adaptive PSO -ACO; Forecasting: BP               | BPNN, ELM, Elman NN, GRNN, WNN                                           |
| 9 | [55] | Wind speed     | Wind farm           | 20 min and 5 months | 3 wind speed datasets; 120 months; 20 min; China                                       | Deterministic | Hybrid      | Preprocessing: FEEMD; Forecasting: RELM                                           | Preprocessing: EMD, WT; Forecasting: ELM, RBF, BPNN, ARIMA               |

|    |      |            |                                             |                         |                                                    |               |        |                                                                                                                                  |                                                                                                                |
|----|------|------------|---------------------------------------------|-------------------------|----------------------------------------------------|---------------|--------|----------------------------------------------------------------------------------------------------------------------------------|----------------------------------------------------------------------------------------------------------------|
| 9  | [56] | Wind speed | Wind farm                                   | 10 min and 1 h          | Wind Speed; 720 samples; 10 min-1 h; China         | Deterministic | Hybrid | Layer 1: EEL<br>(composed by<br>ELM, ENN,<br>LSTM); Layer 2:<br>ELM                                                              | BP, WNN, DBN, ELM,<br>ENN, LSTM, EEL-MEAN<br>and EEL-BP                                                        |
| 10 | [60] | Wind speed | Not speci-<br>fied                          | 10, 30, 60 min          | Wind speed; 2011; 10-30-60 min;<br>China           | Deterministic | Hybrid | Preprocessing:<br>Ssa; Optimiza-<br>tion: FA; Fore-<br>casting: BPNN                                                             | BP-FABP-SSABP                                                                                                  |
| 10 | [61] | Wind speed | Wind farm<br>scheduled<br>and plan-<br>ning | 10 min and 24 h         | Wind speed; 1 year; 10 min-1h;<br>China            | Deterministic | Hybrid | Preprocessing:<br>Box-plot;<br>Optimization:<br>MO (multi<br>objective) -GA-<br>PSO;<br>Forecasting:<br>BPNN, WNN,<br>GRN, ANFIS | GA-BPNN; PSO-BPNN;<br>GAPSO-BPNN; MOPSO-<br>BPNN                                                               |
| 10 | [63] | Wind speed | Unit com-<br>mitment                        | 1, 3, 8, 12 and<br>24 h | Wind speed; 2004-2014; 1 h; New<br>Zealand and USA | Deterministic | Hybrid | ARIMA-FNN                                                                                                                        | Persistence model-<br>ARIMA-FNN-RNN                                                                            |
| 11 | [67] | Wind speed | Wind farm                                   | 10 min and 1 h          | 3 wind speed datasets; 4 days;<br>10 min; Spain    | Deterministic | Hybrid | Preprocessing:<br>VMD, NNIA;<br>Optimization:<br>FCM, NNIA;<br>Forecasting:<br>ARIMA, BPNN,<br>GRNN, BiLSTM                      | Preprocessing: EMD,<br>CEEMD, SSa, VM; Fore-<br>casting: WACD-ARIMA,<br>WACD-BPNN, WACD-<br>GRNN, WACD-BiLSTM. |
| 11 | [68] | Wind speed | Wind farm                                   | 30 min and 1,<br>3 h    | Wind speed; year; --; Turkey                       | Deterministic | Hybrid | VSES                                                                                                                             | O-SES, P-P, T-L                                                                                                |

|    |      |                       |                               |                      |                                                                                               |               |               |                                                             |                                                    |
|----|------|-----------------------|-------------------------------|----------------------|-----------------------------------------------------------------------------------------------|---------------|---------------|-------------------------------------------------------------|----------------------------------------------------|
| 12 | [69] | Wind speed            | Wind farm                     | 10, 30, 60 min       | Wind speed; 2 months; 10-30-60 min; China                                                     | Deterministic | Hybrid        | Preprocessing: SSa; Optimization: WGBA; Forecasting: BP     | BP, BA-BP, WGBA-BP, SSa-BP, SSa-BA-BP              |
| 12 | [71] | Wind speed            | MG                            | 1 h                  | Wind Speed; 1 month; 1 h; --;                                                                 | Deterministic | AI            | LSTM-RNN                                                    | ANN, NARX, SARIMA, ARIMA, ARIMA-ANN                |
| 13 | [72] | Wind speed            | Wind farm                     | 5, 10, 15 and 30 min | Wind speed; 1201 samples; --; Brazil                                                          | Deterministic | AI and Hybrid | LFFFNN, GMDH, SVR, FIS, ANFIS, ANFIS-PSO, ANFIS-GA          | LFFFNN, GMDH, SVR, FIS, ANFIS, ANFIS-PSO, ANFIS-GA |
| 13 | [74] | Wind speed            | Wind speed                    | 1, 5, 10 min         | Wind speed; 01.30.2018 - 03.25.2018 (28800 data); --; China                                   | Deterministic | Hybrid        | LSTM-CNN                                                    | LSTM, CNN                                          |
| 14 | [75] | Wind power            | Wind farm                     | 30 min               | Wind power; 2 years; 10 min; USA                                                              | Deterministic | AI            | E2E                                                         | SVR, kNN                                           |
| 14 | [76] | Wind speed            | Wind farm                     | 3 h                  | Wind speed and direction, temperature, and surface air pressure; 1 year; 1 h; USA             | Probabilistic | Hybrid        | STNN-GRU-CNN; Uncertainty: VB                               | PR, LR, LSTM, CNN, ANN, GPR, HMM                   |
| 14 | [77] | Wind speed            | Wind farm                     | 10 min               | Wind speed; 25 days; 10 min; China                                                            | Deterministic | Hybrid        | Preprocessing: CEEMD; Optimization: MOGWO; Forecasting: ELM | ELM, MOGWO-ELM                                     |
| 14 | [78] | Wind speed            | Wind farm                     | 1, 3, 5 h            | Wind speed; 1 year; 1 h; Spain                                                                | Deterministic | Hybrid        | Preprocessing: VDM; Forecasting: WSFNet-DCA                 | WSFNet-D, WSFNet-CA                                |
| 14 | [79] | Solar and wind power, | Wind farm, photovoltaic park, | 30 min and 1 h       | Real-time energy consumption and weather data (ISO New England website), solar and wind power | Deterministic | AI            | GPR                                                         | LM-BPNN, BR-BPNN and SCG-BPNN                      |

|    |      | consumption<br>energy | and load<br>curve |                      | production data (China); --; 720-<br>4336-4336 for energy, solar and<br>wind samples |               |        |                                                                                                                                |                                                                  |
|----|------|-----------------------|-------------------|----------------------|--------------------------------------------------------------------------------------|---------------|--------|--------------------------------------------------------------------------------------------------------------------------------|------------------------------------------------------------------|
| 14 | [80] | Wind power            | Wind farm         | 10, 20, 30 min       | Wind power; 3 months; 10 min;<br>Brazil                                              | Deterministic | Hybrid | Preprocessing:<br>CEEMD; Fore-<br>casting: STACK<br>ensemble-learn-<br>ing: kNN, PLS,<br>RIDGE, SVR,<br>Cubist regres-<br>sion | CEEMD-kNN, CEEMD-<br>PLS, CEEMD-Ridge,<br>CEEMD-SVR              |
| 15 | [82] | Wind speed            | Wind farm         | 10, 30 and<br>50 min | Wind Speed; 8 days; 10 min; China                                                    | Deterministic | Hybrid | Optimization:<br>AFSA-ACO;<br>Forecasting: ES,<br>ARIMA, BNPP,<br>GRNN, WNN,<br>ENN                                            | BP, ENN, GRNN, WNN,<br>ARIMA, ES                                 |
| 15 | [83] | Wind speed            | Wind farm         | 15 min               | Wind Speed; 1000 samples; 15 min;<br>China                                           | Deterministic | Hybrid | Preprocessing:<br>ICEEMDAN;<br>Forecasting: BP,<br>LSTM, GRU;<br>Postprocessing:<br>ARIMA                                      | BP, LSTM, GRU,<br>ICEEMDAN-BP,<br>ICEEMDAN-LSTM,<br>ICEEMDAN-GRU |

|    |      |            |           |                |                                                           |               |        |                                                                                                                                                     |                                                                                                 |
|----|------|------------|-----------|----------------|-----------------------------------------------------------|---------------|--------|-----------------------------------------------------------------------------------------------------------------------------------------------------|-------------------------------------------------------------------------------------------------|
| 15 | [85] | Wind speed | Wind farm | 10, 20, 30 min | Wind Speed; Jan.1 to Jan.16 (2304 samples); 10 min; China | Probabilistic | Hybrid | Preprocessing: VMD; Optimization: MOMA; Forecasting: ARIMA, BP, ELM, ENN, ANFIS, GMDH, LSSVM; Uncertainty: Extreme Value, Logistic, Rician, Weibull | ANFIS, ARIMA, BP, DBN, ELM, ENN, GMDH, LSSVM, LSTM, EMD-MOMA-EM, ICEEMDAN-MOMA-EM, VDM-MOGWO-EM |
| 15 | [86] | Wind speed | Wind farm | 1 h            | Wind Speed; 1464 samples; 1 h; China                      | Probabilistic | Hybrid | Preprocessing: ICEEMDAN; Optimization: MOMVO; Forecasting: BP, ELM, BiLSTM                                                                          | BP, ELM, BiLSTM, ICEEMDAN-BP, ICEEMDAN-ELM, ICEEMDAN-BiLSTM                                     |
| 15 | [87] | Wind speed | Wind farm | 5, 10, 30 min  | Wind Speed; 9000 samples; 5 min; USA                      | Deterministic | Hybrid | Preprocessing: ICEEMDAN, 1D-RNN, Forecasting: BiLSTM                                                                                                | ICEEMDAN-LSTM, ICEEMDAN-CNN, ICEEMDAN-MLP, CNN, LSTM                                            |
| 15 | [88] | Wind speed | Wind farm | 10 min         | Wind Speed; 3000 samples; 10 min; USA                     | Deterministic | AI     | CWRNN                                                                                                                                               | LSTM, BiLSTM, RNN                                                                               |
| 15 | [89] | Wind speed | Wind farm | 10 min         | Wind Speed; 2880 samples; 10 min; China                   | Probabilistic | Hybrid | Forecasting: BiLSTM; Optimization: IMOTa                                                                                                            | SSa-PSr with (QrLASso, QrLSTM, QrGRU, QrCNN, QrBiLSTM, GPr, BLGM)                               |



---

|    |      |            |           |       |                                           |               |        |                                                                                                |                                                                    |
|----|------|------------|-----------|-------|-------------------------------------------|---------------|--------|------------------------------------------------------------------------------------------------|--------------------------------------------------------------------|
| 15 | [90] | Wind speed | Wind farm | 1 min | Wind Speed; 1500 samples; 1 min;<br>China | Deterministic | Hybrid | Preprocessing:<br>EWT; Forecast-<br>ing: Q-GRU-<br>BiLSTM-DBN;<br>Postprocessing:<br>WPT-ORELM | GRU, BiLSTM, DBN,<br>Q-GRU-BiLSTM-DBN,<br>EWT-Q-GRU-BiLSTM-<br>DBN |
|----|------|------------|-----------|-------|-------------------------------------------|---------------|--------|------------------------------------------------------------------------------------------------|--------------------------------------------------------------------|

---

**Table S2.** Short-term bibliographical references.

| Cluster | Reference | Prediction Objective | Forecasting applied to             | Forecast Horizon | Dataset (inputs; period; sampling horizon; location)                      | Uncertainty modelling | Forecasting Method | Proposed model                                      | Validation models                  |
|---------|-----------|----------------------|------------------------------------|------------------|---------------------------------------------------------------------------|-----------------------|--------------------|-----------------------------------------------------|------------------------------------|
| 1       | [11]      | Wind power           | Wind energy utilization in general | 17 and 34 h      | Wind speed; 150-300 h; 10-20 min; China-Spain                             | Deterministic         | Hybrid             | Optimization: PSO; Forecasting: LSTM-ANN, ARMA, KDE | Compared with real wind speed data |
| 2       | [14]      | Wind power           | Operation plan for a MG            | 24 h             | Not specified                                                             | Probabilistic         | Not specified      | Wind forecast; Uncertainty: Normal distribution     | Not specified                      |
| 2       | [15]      | Wind power           | Control scheme in MG               | 12 h             | Wind power; --; 15 min; China                                             | Probabilistic         | Statistical        | Sparse online warped Gaussian process               | Not specified                      |
| 3       | [17]      | Wind speed           | MG                                 | 24 h             | Wind speed; 1 year; 1 h; --                                               | Deterministic         | Not specified      | Temporal Series                                     | Compared with real wind power data |
| 3       | [18]      | Wind speed           | Wind farm                          | 24 h             | Not specified                                                             | Deterministic         | Statistical        | Weibull                                             | Not specified                      |
| 3       | [19]      | Wind speed           | Unit commitment of MG              | 24 h             | Not specified                                                             | Deterministic         | Statistical        | Weibull                                             | Not specified                      |
| 3       | [20]      | Wind power           | Wind turbine                       | 24 h             | Wind power and direction, power generated, temperature; 190 days; 1 h; -- | Deterministic         | AI                 | ANN-PLM                                             | Naive approach, ANN                |

|   |      |            |                                                        |             |                                                                                                                                                              |               |               |                                                  |                                    |
|---|------|------------|--------------------------------------------------------|-------------|--------------------------------------------------------------------------------------------------------------------------------------------------------------|---------------|---------------|--------------------------------------------------|------------------------------------|
| 3 | [22] | Wind speed | MG                                                     | 24 h        | Wind speed; 1 year; 1 h; --                                                                                                                                  | Deterministic | Not specified | Temporal Series                                  | Compare with real wind power data  |
| 4 | [26] | Wind speed | Energy box in a house (EMS for minigrid-micro turbine) | 24 h        | Wind speed and direction measurement; 2 months data of one weather station (sampling of 3 h) and 1 month data of an anemometer (sampling of 5 min); Portugal | Deterministic | AI            | Multilayer feed-forward BPNN                     | Compared with real wind speed data |
| 4 | [29] | Wind speed | Wind farms                                             | 1 to 3 days | Wind speed and direction, temperature, relative humidity, pressure, and precipitation; 2015-2017; 1 min; India                                               | Deterministic | AI            | MLP BPNN                                         | Compared with real wind speed data |
| 5 | [31] | Wind speed | Micro-wind turbines                                    | 24 h        | Temperature, solar radiation, air pressure, and wind speed; 01.01.2012 - 31.12.2012; 10 min; India                                                           | Deterministic | AI            | BPNN                                             | Compared with real wind speed data |
| 5 | [34] | Wind speed | Not specified                                          | 24 h        | Wind speed and direction, spatial coordinates, altitude; 01.01.2016 - 31.12.2017; 1 h; Romania                                                               | Deterministic | Hybrid        | NWP and generalized additive model               | Compared with real wind speed data |
| 6 | [36] | Wind speed | MG                                                     | 24 h        | Wind speed; --; 1 h; Holland                                                                                                                                 | Probabilistic | AI            | ANN; Uncertainty: Confidence Intervals           | Compared with real wind speed data |
| 6 | [37] | Wind speed | Distribution electricity market                        | 24 h        | Wind Speed                                                                                                                                                   | Probabilistic | Not specified | Not specified – Uncertainty: Standard normal PDF | Compared with real wind speed data |
| 6 | [38] | Wind speed | Smart grid                                             | 24 h        | Wind speed; --; 1 h; --                                                                                                                                      | Deterministic | Statistical   | PDF of Rayleigh                                  | Not specified                      |

---

|   |      |            |    |      |                              |               |        |                                                                          |     |
|---|------|------------|----|------|------------------------------|---------------|--------|--------------------------------------------------------------------------|-----|
| 6 | [39] | Wind power | MG | 24 h | Wind Speed; 1 year; 1 h; USA | Probabilistic | Hybrid | Preprocessing:<br>WNN; Forecast-<br>ing: ANN; Un-<br>certainty:<br>APCCI | ANN |
|---|------|------------|----|------|------------------------------|---------------|--------|--------------------------------------------------------------------------|-----|

---

|   |      |                      |                                                   |      |                                                                                                                                                                  |               |             |                                                                                          |                                       |
|---|------|----------------------|---------------------------------------------------|------|------------------------------------------------------------------------------------------------------------------------------------------------------------------|---------------|-------------|------------------------------------------------------------------------------------------|---------------------------------------|
| 6 | [40] | Wind power           | MG                                                | 24 h | Wind power; 2 months; 10 min; China                                                                                                                              | Deterministic | Hybrid      | Preprocessing: CEEMDAN; Optimization: IBA; Forecasting: GPR                              | WT-GA-SVM, EEMD-PSO-BPNN, EMD-NN      |
| 6 | [41] | Wind speed           | Smart grid                                        | 24 h | Wind Speed; --; 1 h; --                                                                                                                                          | Deterministic | Statistical | PDF of Rayleigh                                                                          | Not specified                         |
| 6 | [42] | Wind speed           | MG                                                | 24 h | Wind Speed                                                                                                                                                       | Deterministic | Hybrid      | Optimization: RNWC; Forecasting: DLANN                                                   | ANN                                   |
| 6 | [43] | Wind speed and power | Smart grid                                        | 24 h | Historical data and forecasting wind speed; 10 years of historical data and 9 months of forecasting data (30-day window for a day); North Sea offshore platforms | Probabilistic | Statistical | PDF of Rayleigh, Nonlinear PDF, Composite distribution; Uncertainty: Normal distribution | Historical PDF                        |
| 6 | [44] | Wind power           | MG                                                | 24 h | Wind Power; 1584 points; 10 min intervals averaged over 1 h; China                                                                                               | Probabilistic | Hybrid      | Preprocessing: CEEMDAN; Optimization: CSBA; Forecasting: LSSVM; Uncertainty: ACCI        | CSBA-LSSVM, CEEDAN-LSSVM, EEMD-GA-GPR |
| 8 | [54] | Wind speed           | Unit commitment and operation offshore wind farms | 24 h | Wind speed of 3 sites; Jan.2018 - Dec. 2018; 1h; Scotland                                                                                                        | Deterministic | Statistical | SARIMA                                                                                   | GRU, LSTM                             |

|    |      |            |                    |           |                                                                                                    |               |               |                                                                                                                                                  |                                                        |
|----|------|------------|--------------------|-----------|----------------------------------------------------------------------------------------------------|---------------|---------------|--------------------------------------------------------------------------------------------------------------------------------------------------|--------------------------------------------------------|
| 10 | [62] | Wind speed | Operation planning | 6 to 72 h | Data from NWP model; 1 year; 3 h;<br>-                                                             | Deterministic | AI            | BNN                                                                                                                                              | LASSO                                                  |
| 11 | [64] | Wind power | Wind farm          | 24 h      | Wind speed; 24 h; 1 min; China                                                                     | Deterministic | Not specified | Wind energy conversion model to convert the wind fluctuation into the electric power fluctuation. A simplified frequency-domain equivalent model | Measurements of an actual wind farm (frequency-domain) |
| 12 | [70] | Wind speed | Wind farm          | 24 h      | Wind speed, max, min tempetura, VP, RHMIN, RHMAX, sunshine hs, precipitation; 10 years; 24 h; Iran | Deterministic | Hybrid        | Grey ELM                                                                                                                                         | NN-SFLA, NN-GA, NN-SA, ELM                             |

**Table S3.** Medium-term bibliographical references.

| Cluster | Reference | Prediction Objective | Forecasting applied to       | Forecast Horizon             | Dataset (inputs; period; sampling horizon; location)                                                                    | Uncertainty modelling | Forecasting Method | Proposed model                                                                 | Validation models                                             |
|---------|-----------|----------------------|------------------------------|------------------------------|-------------------------------------------------------------------------------------------------------------------------|-----------------------|--------------------|--------------------------------------------------------------------------------|---------------------------------------------------------------|
| 2       | [13]      | Wind power           | Unit commitment of wind farm | 3 days                       | Wind power and speed, May.2002 - Apr.2003; 10 min; USA                                                                  | Probabilistic         | AI                 | ANN; Uncertainty: Normal distribution                                          | ANN network structures                                        |
| 3       | [23]      | Wind speed           | MG                           | 72 h                         | Wind speed; 1 year; 1 h; Canada                                                                                         | Deterministic         | Hybrid             | SARIMAX-LSTM                                                                   | LSTM, SARIMAX                                                 |
| 9       | [57]      | Wind power           | Wind Farm                    | 2 days with 15 min intervals | Measured wind speed and wind turbine output power, NWP data; 3 months, 7393 points; 15 min; China                       | Probabilistic         | AI                 | LSTM; Uncertainty: GMM                                                         | RBF, Wavelet, DBN, BP, ELMAN, MDN, RVM                        |
| 9       | [58]      | Wind speed           | Electrical energy production | 48 h                         | Mean wind speed and direction, maximum pressure and temperature, time and relative humidity; 2 months; 10 min; Cameroon | Deterministic         | Hybrid             | MLP, NARX                                                                      | Compares with wind speed measurements                         |
| 11      | [65]      | Wind speed           | Wind farm / wind turbines    | 3 days                       | 3 wind speed datasets; 18 days; 10 min; China                                                                           | Deterministic         | Hybrid             | Preprocessing: ICEEMDAN; Optimization: NNCT; Forecasting: BPNN, ENN, WNN, GRNN | ICEEMDAN, ICEEMDAN-BPNN, ICEEMDAN-ENN, ICEEMDAN-WNN, ICEEMDAN |

**Table S4.** Long-term bibliographical references.

| Cluster | Reference | Prediction Objective | Forecasting applied to                                                 | Forecast Horizon        | Dataset (inputs; period; sampling horizon; location)                                                                                                                  | Uncertainty modelling | Forecasting Method | Proposed model                                                   | Validation models                                                                        |
|---------|-----------|----------------------|------------------------------------------------------------------------|-------------------------|-----------------------------------------------------------------------------------------------------------------------------------------------------------------------|-----------------------|--------------------|------------------------------------------------------------------|------------------------------------------------------------------------------------------|
| 1       | [8]       | Wind speed           | Renewable energy resources                                             | 100 days                | Mean daily Wind speed; 12 years; -- ; Saudi Arabia                                                                                                                    | Deterministic         | AI                 | SVM                                                              | MLP ANN                                                                                  |
| 4       | [25]      | Wind speed           | MG and Smartgrids                                                      | 10 days (daily average) | Daily wind speed, daily maximum and minimum ambient temperature; 2010-2012; Italy                                                                                     | Deterministic         | AI                 | FTDNN, NARX                                                      | Expected outputs                                                                         |
| 4       | [28]      | Wind speed           | Wind farms, power systems                                              | 1 year                  | Monthly average wind speed and direction measurement; 1 year; 1 month; India                                                                                          | Deterministic         | AI                 | kNN, MLP-ANN                                                     | Monthly wind speed measurement                                                           |
| 5       | [32]      | Wind speed           | Not specified                                                          | 1 month                 | Atmospheric pressure, heating and cooling degree-days elevation, earth and air temperature, relative humidity, latitude, longitude; 12 months; 1 month average; India | Deterministic         | Hybrid             | Preprocessing: EMD; Optimization: Tabu search; Forecasting: GRNN | EMD-Fruit fly optimization-GRNN; EMD-GRNN; Tabu search-GRNN; Fruit fly optimization-GRNN |
| 9       | [59]      | Wind speed           | Utilization of wind energy and the reduced required wind farm reserves | 12 months               | Maximum and minimum temperature, precipitation values, maximum and minimum humidity, wind speed and sunshine hours; 10 years; average monthly values; Iran            | Deterministic         | Hybrid             | NN-GA, NN-SA, NN-SFLA                                            | Moving Average                                                                           |



---

|    |      |                                  |    |         |                                                           |               |        |                                                                                                      |                               |
|----|------|----------------------------------|----|---------|-----------------------------------------------------------|---------------|--------|------------------------------------------------------------------------------------------------------|-------------------------------|
| 11 | [66] | Wind speed and solar irradiation | MG | 10 days | Wind speed and solar irradiation data; 1 year; 1 h; Italy | Probabilistic | Hybrid | Preprocessing:<br>WT method,<br>NNMFOA; Optimization:<br>MOMFOA; Forecasting:<br>GMDH neural network | NN-GA, NN-PSO, NN-ACO, NN-FOA |
|----|------|----------------------------------|----|---------|-----------------------------------------------------------|---------------|--------|------------------------------------------------------------------------------------------------------|-------------------------------|

---

## References

1. Technologies Available online: <https://www.irena.org/Statistics/View-Data-by-Topic/Capacity-and-Generation/Technologies> (accessed on 8 May 2022).
2. GWEC-Global-Wind-Report-2021;
3. Theo, W.L.; Lim, J.S.; Ho, W.S.; Hashim, H.; Lee, C.T. Review of Distributed Generation (DG) System Planning and Optimisation Techniques: Comparison of Numerical and Mathematical Modelling Methods. *Renewable and Sustainable Energy Reviews* **2017**, *67*, 531–573.
4. PRISMA\_Spanish.
5. Waltman, L.; van Eck, N.J.; Noyons, E.C.M. A Unified Approach to Mapping and Clustering of Bibliometric Networks. *Journal of Informetrics* **2010**, *4*, 629–635, doi:10.1016/j.joi.2010.07.002.
6. Waltman, L.; van Eck, N.J. A Smart Local Moving Algorithm for Large-Scale Modularity-Based Community Detection. *European Physical Journal B* **2013**, *86*, doi:10.1140/epjb/e2013-40829-0.
7. Caicedo, J.E.; Romero, A.A.; Zini, H.C. Evaluación de La Distorsión Armónica En Sistemas de Distribución Residencial: Revisión Literaria. *Ingeniería e Investigacion* **2017**, *37*, 72–84, doi:10.15446/ing.investig.v37n3.64913.
8. Mohandes, M.A.; Halawani, T.O.; Rehman, S.; Hussain, A.A. Support Vector Machines for Wind Speed Prediction. *Renewable Energy* **2004**, *29*, 939–947, doi:10.1016/j.renene.2003.11.009.
9. Žarković, M.; Šošić, D.; Dobrić, G. Fuzzy Based Prediction of Wind Distributed Generation Impact on Distribution Network: Case Study - Banat Region, Serbia. *Journal of Renewable and Sustainable Energy* **2014**, *6*, doi:10.1063/1.4862988.
10. Carrillo, M.; del Ser, J.; Nekane Bilbao, M.; Perfecto, C.; Camacho, D. *Wind Power Production Forecasting Using Ant Colony Optimization and Extreme Learning Machines*; 2017; Vol. 737;.
11. Zhang, Y.; Gao, S.; Han, J.; Ban, M. Wind Speed Prediction Research Considering Wind Speed Ramp and Residual Distribution. *IEEE Access* **2019**, *7*, 131873–131887, doi:10.1109/ACCESS.2019.2940897.
12. Shahid, F.; Zameer, A.; Mehmood, A.; Raja, M.A.Z. A Novel Wavenets Long Short Term Memory Paradigm for Wind Power Prediction. *Applied Energy* **2020**, *269*, doi:10.1016/j.apenergy.2020.115098.
13. Methaprayoon, K.; Yingvivatanapong, C.; Lee, W.J.; Liao, J.R. An Integration of ANN Wind Power Estimation into Unit Commitment Considering the Forecasting Uncertainty. *IEEE Transactions on Industry Applications* **2007**, *43*, doi:10.1109/TIA.2007.908203.
14. Akbarpour, M.; Esmailnia Shirvani, R.; Lohi, M.; khalilifar, H. Optimal Operation of a Microgrid in the Power Market Environment by PSO Algorithm. *Life Science Journal* **2012**, *9*.
15. Kou, P.; Liang, D.; Gao, L.; Gao, F. Stochastic Coordination of Plug-In Electric Vehicles and Wind Turbines in Microgrid: A Model Predictive Control Approach. *IEEE Transactions on Smart Grid* **2016**, *7*, 1537–1551, doi:10.1109/TSG.2015.2475316.
16. Zhou, Z.; Xiong, F.; Huang, B.; Xu, C.; Jiao, R.; Liao, B.; Yin, Z.; Li, J. Game-Theoretical Energy Management for Energy Internet with Big Data-Based Renewable Power Forecasting. *IEEE Access* **2017**, *5*, doi:10.1109/ACCESS.2017.2658952.
17. Chen, S.X.; Gooi, H.B.; Wang, M.Q. Sizing of Energy Storage for Microgrids. *IEEE Transactions on Smart Grid* **2012**, doi:10.1109/TSG.2011.2160745.
18. Xu, Y.; Dong, Z.Y.; Xu, Z.; Meng, K.; Wong, K.P. An Intelligent Dynamic Security Assessment Framework for Power Systems with Wind Power. *IEEE Transactions on Industrial Informatics* **2012**, doi:10.1109/TII.2012.2206396.
19. Khorramdel, H.; Aghaei, J.; Khorramdel, B.; Siano, P. Optimal Battery Sizing in Microgrids Using Probabilistic Unit Commitment. *IEEE Transactions on Industrial Informatics* **2016**, doi:10.1109/TII.2015.2509424.
20. Genikomsakis, K.N.; Lopez, S.; Dallas, P.I.; Ioakimidis, C.S. Simulation of Wind-Battery Microgrid Based on Short-Term Wind Power Forecasting. *Applied Sciences (Switzerland)* **2017**, doi:10.3390/app7111142.
21. Khalid, M. Wind Power Economic Dispatch - Impact of Radial Basis Functional Networks and Battery Energy Storage. *IEEE Access* **2019**, doi:10.1109/ACCESS.2019.2905620.

22. Tian, Y. fei; Liao, R. jin; Farkoush, S.G. Placement and Sizing of EESS Bundled with Uncertainty Modeling by Two-Stage Stochastic Search Based on Improved Shark Smell Optimization Algorithm in Micro-Grids. *Energy Reports* **2021**, doi:10.1016/j.egy.2021.07.019.
23. Shirzadi, N.; Nasiri, F.; El-Bayeh, C.; Eicker, U. Optimal Dispatching of Renewable Energy-Based Urban Microgrids Using a Deep Learning Approach for Electrical Load and Wind Power Forecasting. *International Journal of Energy Research* **2022**, doi:10.1002/er.7374.
24. Palma-Behnke, R.; Benavides, C.; Lanas, F.; Severino, B.; Reyes, L.; Llanos, J.; Saez, D. A Microgrid Energy Management System Based on the Rolling Horizon Strategy. *IEEE Transactions on Smart Grid* **2013**, *4*, 996–1006, doi:10.1109/TSG.2012.2231440.
25. di Piazza, A.; di Piazza, M.C.; Vitale, G. Estimation and Forecast of Wind Power Generation by FTDNN and NARX-Net Based Models for Energy Management Purpose in Smart Grids. *Renewable Energy and Power Quality Journal* **2014**, *1*, 995–1000, doi:10.24084/repqj12.560.
26. Ioakimidis, C.S.; Oliveira, L.J.; Genikomsakis, K.N. Wind Power Forecasting in a Residential Location as Part of the Energy Box Management Decision Tool. *IEEE Transactions on Industrial Informatics* **2014**, *10*, 2103–2111, doi:10.1109/TII.2014.2334056.
27. Guo, L.; Liu, W.; Li, X.; Liu, Y.; Jiao, B.; Wang, W.; Wang, C.; Li, F. Energy Management System for Stand-Alone Wind-Powered-Desalination Microgrid. *IEEE Transactions on Smart Grid* **2016**, *7*, 1079–1087, doi:10.1109/TSG.2014.2377374.
28. Azeem, A.; Fatema, N.; Malik, H.  $\kappa$ -NN and ANN Based Deterministic and Probabilistic Wind Speed Forecasting Intelligent Approach. *Journal of Intelligent and Fuzzy Systems* **2018**, *35*, 5021–5031, doi:10.3233/JIFS-169786.
29. Malik, H.; Khurshaid, T.; Almutairi, A.; Alotaibi, M.A. Multi-Step Ahead Time-Series Wind Speed Forecasting for Smart-Grid Application. *Journal of Intelligent and Fuzzy Systems* **2022**, *42*, 633–646, doi:10.3233/JIFS-189736.
30. Hong, Y.-Y.; Yu, T.-H.; Liu, C.-Y. Hour-Ahead Wind Speed and Power Forecasting Using Empirical Mode Decomposition. *Energies (Basel)* **2013**, *6*, 6137–6152, doi:10.3390/en6126137.
31. Ramasamy, P.; Chandel, S.S.; Yadav, A.K. Wind Speed Prediction in the Mountainous Region of India Using an Artificial Neural Network Model. *Renewable Energy* **2015**, *80*, 338–347, doi:10.1016/j.renene.2015.02.034.
32. Vidya, S.; Srie Vidhya Janani, E. Tabu Search Algorithm Based General Regression Neural Network for Long Term Wind Speed Predictions. *Automatika* **2020**, *61*, 657–669, doi:10.1080/00051144.2020.1811571.
33. Adediji, P.A.; Akinlabi, S.A.; Madushele, N.; Olatunji, O.O. Hybrid Neurofuzzy Wind Power Forecast and Wind Turbine Location for Embedded Generation. *International Journal of Energy Research* **2021**, *45*, 413–428, doi:10.1002/er.5620.
34. Brabec, M.; Craciun, A.; Dumitrescu, A. Hybrid Numerical Models for Wind Speed Forecasting. *Journal of Atmospheric and Solar-Terrestrial Physics* **2021**, *220*, 105669, doi:10.1016/j.jastp.2021.105669.
35. Shboul, B.; AL-Arifi, I.; Michailos, S.; Ingham, D.; Ma, L.; Hughes, K.J.; Pourkashanian, M. A New ANN Model for Hourly Solar Radiation and Wind Speed Prediction: A Case Study over the North & South of the Arabian Peninsula. *Sustainable Energy Technologies and Assessments* **2021**, *46*, 101248, doi:10.1016/j.seta.2021.101248.
36. Motevasel, M.; Seifi, A.R. Expert Energy Management of a Micro-Grid Considering Wind Energy Uncertainty. *Energy Conversion and Management* **2014**, *83*, 58–72, doi:10.1016/j.enconman.2014.03.022.
37. Majumder, S.; Khaparde, S.A. Revenue and Ancillary Benefit Maximisation of Multiple Non-Collocated Wind Power Producers Considering Uncertainties. *IET Generation, Transmission and Distribution* **2016**, *10*, 789–797, doi:10.1049/iet-gtd.2015.0480.
38. Aghajani, G.R.; Shayanfar, H.A.; Shayeghi, H. Demand Side Management in a Smart Micro-Grid in the Presence of Renewable Generation and Demand Response. *Energy* **2017**, *126*, 622–637, doi:10.1016/j.energy.2017.03.051.
39. Sarshar, J.; Moosapour, S.S.; Joorabian, M. Multi-Objective Energy Management of a Micro-Grid Considering Uncertainty in Wind Power Forecasting. *Energy* **2017**, *139*, 680–693, doi:10.1016/j.energy.2017.07.138.
40. Sun, S.; Fu, J.; Wei, L.; Li, A. Multi-Objective Optimal Dispatching for a Grid-Connected Micro-Grid Considering Wind Power Forecasting Probability. *IEEE Access* **2020**, *8*, 46981–46997, doi:10.1109/ACCESS.2020.2977921.
41. Alilou, M.; Tousi, B.; Shayeghi, H. Multi-Objective Energy Management of Smart Homes Considering Uncertainty in Wind Power Forecasting. *Electrical Engineering* **2021**, *103*, 1367–1383, doi:10.1007/s00202-020-01165-6.

42. Alizadeh Bidgoli, M.; Ahmadian, A. Multi-Stage Optimal Scheduling of Multi-Microgrids Using Deep-Learning Artificial Neural Network and Cooperative Game Approach. *Energy* **2022**, *239*, doi:10.1016/j.energy.2021.122036.
43. Scarabaggio, P.; Grammatico, S.; Carli, R.; Dotoli, M. Distributed Demand Side Management with Stochastic Wind Power Forecasting. *IEEE Transactions on Control Systems Technology* **2022**, *30*, 97–112, doi:10.1109/TCST.2021.3056751.
44. Sun, S.; Wang, C.; Wang, Y.; Zhu, X.; Lu, H. Multi-Objective Optimization Dispatching of a Micro-Grid Considering Uncertainty in Wind Power Forecasting. *Energy Reports* **2022**, *8*, 2859–2874, doi:10.1016/j.egyr.2022.01.175.
45. Doucoure, B.; Agbossou, K.; Cardenas, A. Time Series Prediction Using Artificial Wavelet Neural Network and Multi-Resolution Analysis: Application to Wind Speed Data. *Renewable Energy* **2016**, *92*, 202–211, doi:10.1016/j.renene.2016.02.003.
46. Liu, J.; Wang, X.; Lu, Y. A Novel Hybrid Methodology for Short-Term Wind Power Forecasting Based on Adaptive Neuro-Fuzzy Inference System. *Renewable Energy* **2017**, *103*, 620–629, doi:10.1016/j.renene.2016.10.074.
47. Li, H.; Wang, J.; Lu, H.; Guo, Z. Research and Application of a Combined Model Based on Variable Weight for Short Term Wind Speed Forecasting. *Renewable Energy* **2018**, *116*, 669–684, doi:10.1016/j.renene.2017.09.089.
48. Sharma, R.; Shikhola, T.; Kohli, J.K. Modified Fuzzy Q-Learning Based Wind Speed Prediction. *Journal of Wind Engineering and Industrial Aerodynamics* **2020**, *206*, 104361, doi:10.1016/j.jweia.2020.104361.
49. Xu, Y.; Liu, H.; Long, Z. A Distributed Computing Framework for Wind Speed Big Data Forecasting on Apache Spark. *Sustainable Energy Technologies and Assessments* **2020**, *37*, doi:10.1016/j.seta.2019.100582.
50. Soleimani, P.; Emami, B.; Rafei, M.; Shahrasbi, H. Forecasting the Wind Direction by Using Time Series Models with Long-Term Memory (Case Study: Nayer Region). *International Journal of Energy Sector Management* **2021**, *15*, 385–396, doi:10.1108/IJESM-04-2019-0002.
51. Fang, T.; Lahdelma, R. Evaluation of a Multiple Linear Regression Model and SARIMA Model in Forecasting Heat Demand for District Heating System. *Applied Energy* **2016**, *179*, doi:10.1016/j.apenergy.2016.06.133.
52. Ma, X.; Jin, Y.; Dong, Q. A Generalized Dynamic Fuzzy Neural Network Based on Singular Spectrum Analysis Optimized by Brain Storm Optimization for Short-Term Wind Speed Forecasting. *Applied Soft Computing Journal* **2017**, *54*, doi:10.1016/j.asoc.2017.01.033.
53. Yao, Z.; Wang, C. A Hybrid Model Based on a Modified Optimization Algorithm and an Artificial Intelligence Algorithm for Short-Term Wind Speed Multi-Step Ahead Forecasting. *Sustainability (Switzerland)* **2018**, *10*, doi:10.3390/su10051443.
54. Liu, X.; Lin, Z.; Feng, Z. Short-Term Offshore Wind Speed Forecast by Seasonal ARIMA - A Comparison against GRU and LSTM. *Energy* **2021**, *227*, doi:10.1016/j.energy.2021.120492.
55. Sun, W.; Liu, M. Wind Speed Forecasting Using FEEMD Echo State Networks with RELM in Hebei, China. *Energy Conversion and Management* **2016**, *114*, doi:10.1016/j.enconman.2016.02.022.
56. Chen, M.R.; Zeng, G.Q.; Lu, K. di; Weng, J. A Two-Layer Nonlinear Combination Method for Short-Term Wind Speed Prediction Based on ELM, ENN, and LSTM. *IEEE Internet of Things Journal* **2019**, *6*, doi:10.1109/JIOT.2019.2913176.
57. Zhang, J.; Yan, J.; Infield, D.; Liu, Y.; Lien, F. sang Short-Term Forecasting and Uncertainty Analysis of Wind Turbine Power Based on Long Short-Term Memory Network and Gaussian Mixture Model. *Applied Energy* **2019**, *241*, doi:10.1016/j.apenergy.2019.03.044.
58. Talla Konchou, F.A.; Tiam Kapen, P.; Kenfack Magnissob, S.B.; Youssoufa, M.; Tchinda, R. Prediction of Wind Speed Profile Using Two Artificial Neural Network Models: An Ab Initio Investigation in the Bapouh's City, Cameroon. *International Journal of Energy Sector Management* **2020**, *15*, doi:10.1108/IJESM-04-2020-0008.
59. Mostafaeipour, A.; Goli, A.; Rezaei, M.; Qolipour, M.; Arabnia, H.R.; Goudarzi, H.; Behnam, E. Performance of Different Hybrid Algorithms for Prediction of Wind Speed Behavior. *Wind Engineering* **2021**, *45*, doi:10.1177/0309524X19882431.
60. Gao, Y.; Qu, C.; Zhang, K. A Hybrid Method Based on Singular Spectrum Analysis, Firefly Algorithm, and BP Neural Network for Short-Term Wind Speed Forecasting. *Energies (Basel)* **2016**, *9*, doi:10.3390/en9100757.
61. Zhou, Q.; Wang, C.; Zhang, G. Hybrid Forecasting System Based on an Optimal Model Selection Strategy for Different Wind Speed Forecasting Problems. *Applied Energy* **2019**, *250*, doi:10.1016/j.apenergy.2019.05.016.

62. Mohsin, S.; Ramli, S.N.; Imdad, M. Medium-Term Wind Speed Prediction Using Bayesian Neural Network (BNN). *International Journal of Systematic Innovation* **2021**, *6*, doi:10.6977/IJoSI.202109\_6(5).0002.
63. Sun, F.; Jin, T. A Hybrid Approach to Multi-Step, Short-Term Wind Speed Forecasting Using Correlated Features. *Renewable Energy* **2022**, *186*, doi:10.1016/j.renene.2022.01.041.
64. Jin, Y.; Ju, P.; Rehtanz, C.; Wu, F.; Pan, X. Equivalent Modeling of Wind Energy Conversion Considering Overall Effect of Pitch Angle Controllers in Wind Farm. *Applied Energy* **2018**, *222*, doi:10.1016/j.apenergy.2018.03.180.
65. Song, J.; Wang, J.; Lu, H. A Novel Combined Model Based on Advanced Optimization Algorithm for Short-Term Wind Speed Forecasting. *Applied Energy* **2018**, *215*, doi:10.1016/j.apenergy.2018.02.070.
66. Heydari, A.; Astiaso Garcia, D.; Keynia, F.; Bisegna, F.; de Santoli, L. A Novel Composite Neural Network Based Method for Wind and Solar Power Forecasting in Microgrids. *Applied Energy* **2019**, *251*, doi:10.1016/j.apenergy.2019.113353.
67. Zhang, H.; Luo, H. An Advanced Hybrid Forecasting System for Wind Speed Point Forecasting and Interval Forecasting. *Complexity* **2020**, *2020*, doi:10.1155/2020/7854286.
68. Ağbulut, Ü. A Novel Stochastic Model for Very Short-Term Wind Speed Forecasting in the Determination of Wind Energy Potential of a Region: A Case Study from Turkey. *Sustainable Energy Technologies and Assessments* **2022**, *51*, doi:10.1016/j.seta.2021.101853.
69. Niu, T.; Wang, J.; Zhang, K.; Du, P. Multi-Step-Ahead Wind Speed Forecasting Based on Optimal Feature Selection and a Modified Bat Algorithm with the Cognition Strategy. *Renewable Energy* **2018**, doi:10.1016/j.renene.2017.10.075.
70. Qolipour, M.; Mostafaeipour, A.; Saidi-Mehrabad, M.; Arabnia, H.R. Prediction of Wind Speed Using a New Grey-Extreme Learning Machine Hybrid Algorithm: A Case Study. *Energy and Environment* **2019**, doi:10.1177/0958305X18787258.
71. Kumar, D.; Mathur, H.D.; Bhanot, S.; Bansal, R.C. Forecasting of Solar and Wind Power Using LSTM RNN for Load Frequency Control in Isolated Microgrid. *International Journal of Modelling and Simulation* **2021**, doi:10.1080/02286203.2020.1767840.
72. Khosravi, A.; Machado, L.; Nunes, R.O. Time-Series Prediction of Wind Speed Using Machine Learning Algorithms: A Case Study Osorio Wind Farm, Brazil. *Applied Energy* **2018**, *224*, 550–566, doi:10.1016/j.apenergy.2018.05.043.
73. Etemadi, M.; Abdollahi, A.; Rashidinejad, M.; Aalami, H.A. Wind Turbine Output Power Prediction in a Probabilistic Framework Based on Fuzzy Intervals. *Iranian Journal of Science and Technology - Transactions of Electrical Engineering* **2021**, *45*, 131–139, doi:10.1007/s40998-020-00359-9.
74. Xu, X.; Wei, Y. An Ultra-Short-Term Wind Speed Prediction Model Using LSTM and CNN. *Multimedia Tools and Applications* **2022**, *81*, 10819–10837, doi:10.1007/s11042-022-12215-5.
75. Yu, R.; Liu, Z.; Li, X.; Lu, W.; Ma, D.; Yu, M.; Wang, J.; Li, B. Scene Learning: Deep Convolutional Networks for Wind Power Prediction by Embedding Turbines into Grid Space. *Applied Energy* **2019**, doi:10.1016/j.apenergy.2019.01.010.
76. Liu, Y.; Qin, H.; Zhang, Z.; Pei, S.; Jiang, Z.; Feng, Z.; Zhou, J. Probabilistic Spatiotemporal Wind Speed Forecasting Based on a Variational Bayesian Deep Learning Model. *Applied Energy* **2020**, doi:10.1016/j.apenergy.2019.114259.
77. Wu, C.; Wang, J.; Chen, X.; Du, P.; Yang, W. A Novel Hybrid System Based on Multi-Objective Optimization for Wind Speed Forecasting. *Renewable Energy* **2020**, doi:10.1016/j.renene.2019.04.157.
78. Acikgoz, H.; Budak, U.; Korkmaz, D.; Yildiz, C. WSNNet: An Efficient Wind Speed Forecasting Model Using Channel Attention-Based Densely Connected Convolutional Neural Network. *Energy* **2021**, doi:10.1016/j.energy.2021.121121.
79. Ahmad, T.; Zhang, D.; Huang, C. Methodological Framework for Short-and Medium-Term Energy, Solar and Wind Power Forecasting with Stochastic-Based Machine Learning Approach to Monetary and Energy Policy Applications. *Energy* **2021**, doi:10.1016/j.energy.2021.120911.
80. da Silva, R.G.; Ribeiro, M.H.D.M.; Moreno, S.R.; Mariani, V.C.; Coelho, L. dos S. A Novel Decomposition-Ensemble Learning Framework for Multi-Step Ahead Wind Energy Forecasting. *Energy* **2021**, doi:10.1016/j.energy.2020.119174.
81. Severiano, C.A.; Silva, P.C. de L. e.; Weiss Cohen, M.; Guimarães, F.G. Evolving Fuzzy Time Series for Spatio-Temporal Forecasting in Renewable Energy Systems. *Renewable Energy* **2021**, doi:10.1016/j.renene.2021.02.117.

82. Zhang, K.; Qu, Z.; Dong, Y.; Lu, H.; Leng, W.; Wang, J.; Zhang, W. Research on a Combined Model Based on Linear and Nonlinear Features - A Case Study of Wind Speed Forecasting. *Renewable Energy* **2019**, *130*, 814–830, doi:10.1016/j.renene.2018.05.093.
83. Duan, J.; Zuo, H.; Bai, Y.; Duan, J.; Chang, M.; Chen, B. Short-Term Wind Speed Forecasting Using Recurrent Neural Networks with Error Correction. *Energy* **2021**, *217*, doi:10.1016/j.energy.2020.119397.
84. Kosana, V.; Madasthu, S.; Teeparthi, K. A Novel Hybrid Framework for Wind Speed Forecasting Using Autoencoder-Based Convolutional Long Short-Term Memory Network. *International Transactions on Electrical Energy Systems* **2021**, *31*, doi:10.1002/2050-7038.13072.
85. Liu, Z.; Jiang, P.; Wang, J.; Zhang, L. Ensemble Forecasting System for Short-Term Wind Speed Forecasting Based on Optimal Sub-Model Selection and Multi-Objective Version of Mayfly Optimization Algorithm. *Expert Systems with Applications* **2021**, *177*, doi:10.1016/j.eswa.2021.114974.
86. Nie, Y.; Liang, N.; Wang, J. Ultra-Short-Term Wind-Speed Bi-Forecasting System via Artificial Intelligence and a Double-Forecasting Scheme. *Applied Energy* **2021**, *301*, doi:10.1016/j.apenergy.2021.117452.
87. Kosana, V.; Teeparthi, K.; Madasthu, S. Hybrid Wind Speed Prediction Framework Using Data Pre-Processing Strategy Based Autoencoder Network. *Electric Power Systems Research* **2022**, *206*, doi:10.1016/j.epsr.2022.107821.
88. Shi, Y.; Wang, Y.; Zheng, H. Wind Speed Prediction for Offshore Sites Using a Clockwork Recurrent Network. *Energies (Basel)* **2022**, *15*, doi:10.3390/en15030751.
89. Wang, J.; Wang, S.; Zeng, B.; Lu, H. A Novel Ensemble Probabilistic Forecasting System for Uncertainty in Wind Speed. *Applied Energy* **2022**, *313*, doi:10.1016/j.apenergy.2022.118796.
90. Yang, R.; Liu, H.; Nikitas, N.; Duan, Z.; Li, Y.; Li, Y. Short-Term Wind Speed Forecasting Using Deep Reinforcement Learning with Improved Multiple Error Correction Approach. *Energy* **2022**, *239*, doi:10.1016/j.energy.2021.122128.
91. Ahmadi, M.; Khashei, M. Current Status of Hybrid Structures in Wind Forecasting. *Engineering Applications of Artificial Intelligence* **2021**, *99*, doi:10.1016/j.engappai.2020.104133.
92. Khamparia, A.; Singh, K.M. A Systematic Review on Deep Learning Architectures and Applications. *Expert Systems* **2019**, *36*, doi:10.1111/exsy.12400.
93. Ozcanli, A.K.; Yaprakdal, F.; Baysal, M. Deep Learning Methods and Applications for Electrical Power Systems: A Comprehensive Review. *International Journal of Energy Research* **2020**, *44*, 7136–7157.
94. Rezaee Jordehi, A. Allocation of Distributed Generation Units in Electric Power Systems: A Review. *Renewable and Sustainable Energy Reviews* **2016**, *56*, 893–905.
95. Colson, C.M.; Nehrir, M.H. A Review of Challenges to Real-Time Power Management of Microgrids. In Proceedings of the 2009 IEEE Power and Energy Society General Meeting, PES '09; 2009.
96. International Electrotechnical Commission; International Electrotechnical Commission. Technical Committee 88 : Wind Turbines *Wind Turbines. Part 2, Small Wind Turbines*; ISBN 9782832212844.
97. Ley-21118\_17-NOV-2018.
98. República de Colombia;
99. Zavala, V.M.; Constantinescu, E.M.; Anitescu, M. Economic Impacts of Advanced Weather Forecasting on Energy System Operations. In Proceedings of the Innovative Smart Grid Technologies Conference, ISGT 2010; 2010.
100. Eskandar, H.; Sadollah, A.; Bahreininejad, A.; Hamdi, M. Water Cycle Algorithm - A Novel Metaheuristic Optimization Method for Solving Constrained Engineering Optimization Problems. *Computers and Structures* **2012**, *110–111*, 151–166, doi:10.1016/j.compstruc.2012.07.010.
101. Chandana, S.; Mayorga, R. v. The New Rough Neuron. In Proceedings of the Proceedings of 2005 International Conference on Neural Networks and Brain Proceedings, ICNNB'05; 2005; Vol. 1, pp. 13–18.
102. Yan, J.; Liu, Y.; Han, S.; Wang, Y.; Feng, S. Reviews on Uncertainty Analysis of Wind Power Forecasting. *Renewable and Sustainable Energy Reviews* **2015**, *52*, 1322–1330.
